# Supplementary material for: Molecular Surveillance for Vector-Borne Bacteria in Rodents and Tree Shrews of Peninsular Malaysia Oil Palm Plantations
Source: MDPI journal article supplement (doi:10.3390/tropicalmed8020074), 2023-01-19
Supplement: s1 [file s1]

## Supplementary Figures

**Figure S1.** Positions with heterozygous double peaks in the *sucD* allele of *Orientia tsutsugamushi*.

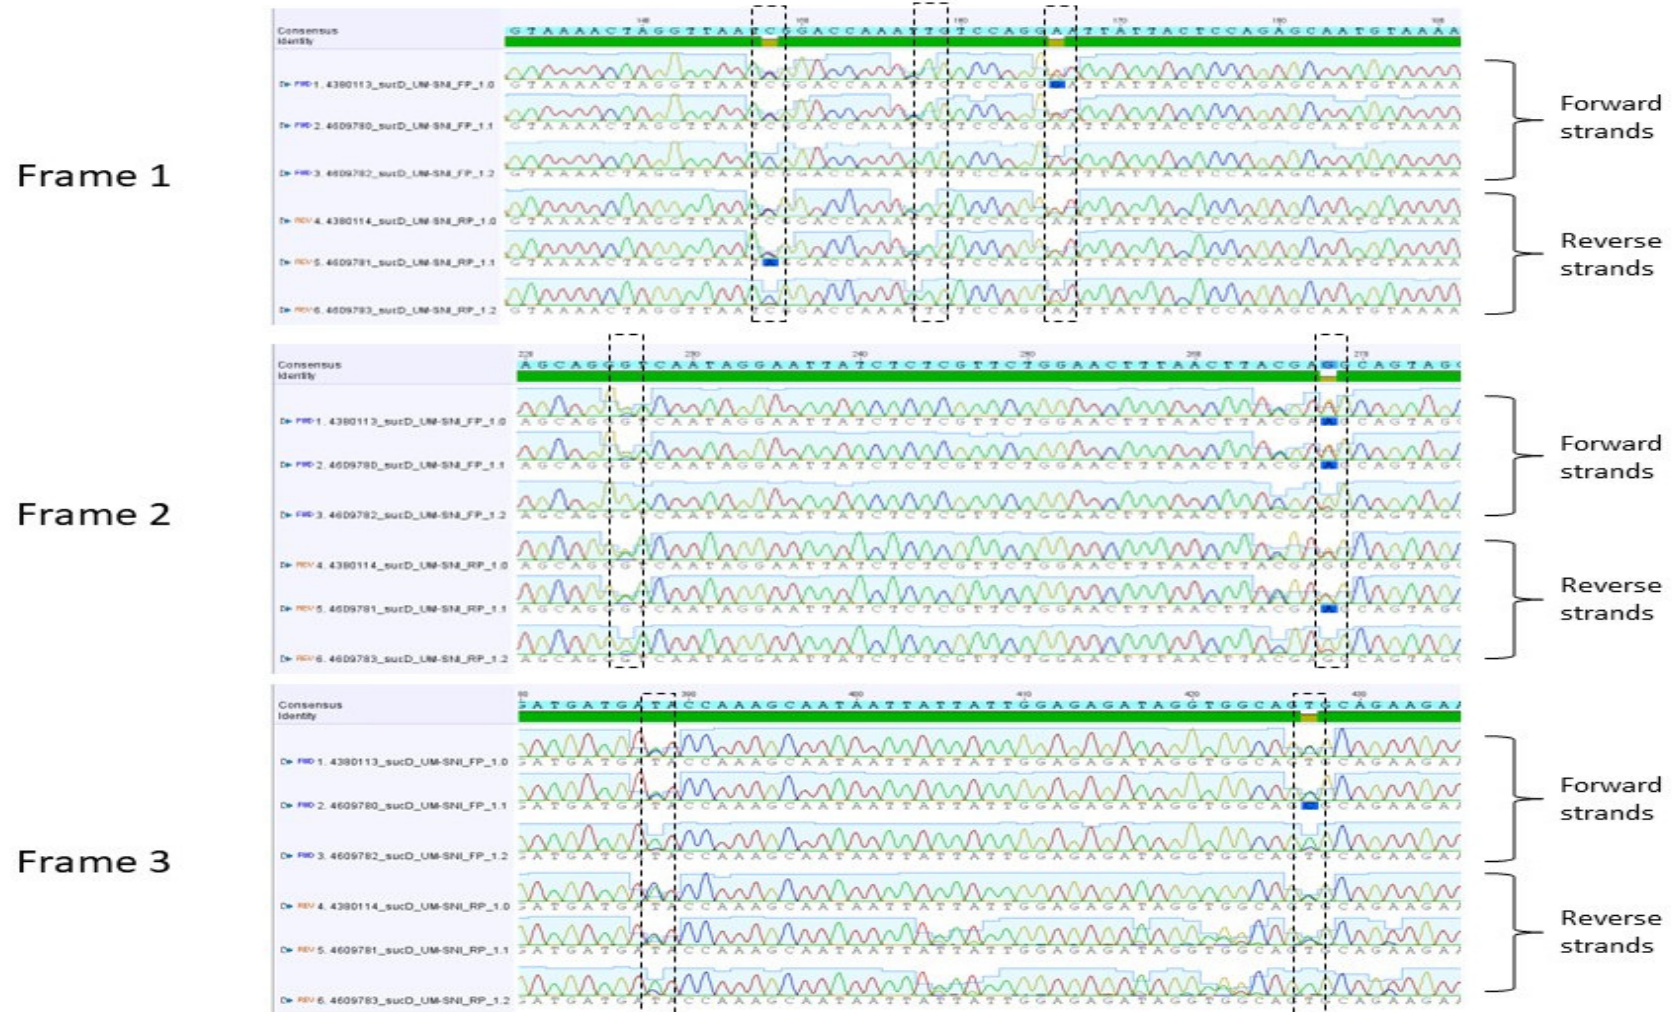

**Figure S2.** Positions with heterozygous double peaks in the *ppdK* allele of *Orientia tsutsugamushi*.

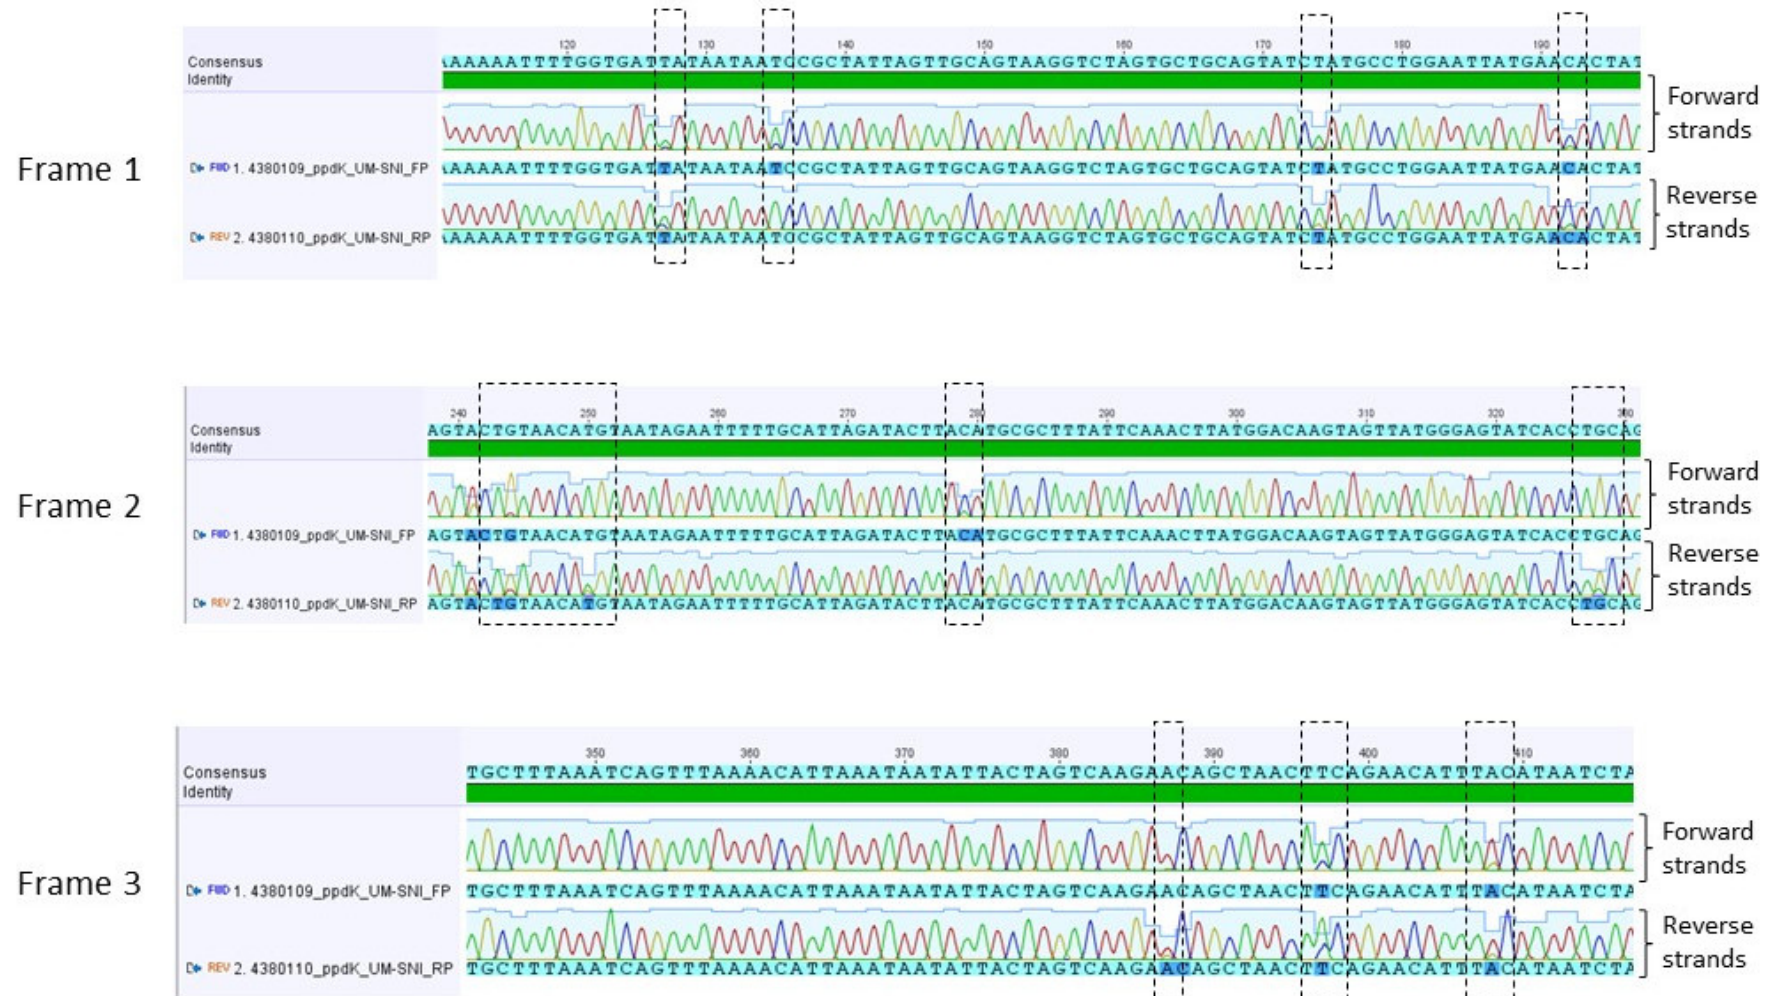



**Figure S3.** Similarities of *clpA* allele 310 (*Borrelia yangtzensis*) with closely related *clpA* alleles in the PubMLST database.

| Allele    | % Identity | Mismatches | Gaps | Alignment | Compare                                                                               |
|-----------|------------|------------|------|-----------|---------------------------------------------------------------------------------------|
| clpA: 82  | 99.136     | 5          | 0    | 579/579   |    |
| clpA: 81  | 99.136     | 5          | 0    | 579/579   |    |
| clpA: 76  | 98.964     | 6          | 0    | 579/579   |    |
| clpA: 100 | 98.791     | 7          | 0    | 579/579   |    |
| clpA: 79  | 98.618     | 8          | 0    | 579/579   |    |
| clpA: 78  | 98.618     | 8          | 0    | 579/579   |    |
| clpA: 83  | 98.273     | 10         | 0    | 579/579   |    |
| clpA: 89  | 98.100     | 11         | 0    | 579/579   |    |
| clpA: 84  | 98.100     | 11         | 0    | 579/579   |    |
| clpA: 75  | 98.100     | 11         | 0    | 579/579   |    |
| clpA: 80  | 97.582     | 14         | 0    | 579/579   |    |
| clpA: 50  | 96.718     | 19         | 0    | 579/579   |    |
| clpA: 257 | 96.718     | 19         | 0    | 579/579   |    |
| clpA: 49  | 96.546     | 20         | 0    | 579/579   |   |
| clpA: 110 | 96.546     | 20         | 0    | 579/579   |  |
| clpA: 96  | 96.373     | 21         | 0    | 579/579   |  |
| clpA: 77  | 96.200     | 22         | 0    | 579/579   |  |
| clpA: 297 | 94.646     | 31         | 0    | 579/579   |  |
| clpA: 179 | 91.883     | 47         | 0    | 579/579   |  |
| clpA: 32  | 91.537     | 49         | 0    | 579/579   |  |
| clpA: 299 | 91.537     | 49         | 0    | 579/579   |  |
| clpA: 234 | 91.537     | 49         | 0    | 579/579   |  |
| clpA: 74  | 91.379     | 48         | 2    | 580/579   |  |
| clpA: 74  | 91.379     | 48         | 2    | 580/579   |  |
| clpA: 28  | 91.364     | 50         | 0    | 579/579   |  |
| clpA: 26  | 91.364     | 50         | 0    | 579/579   |  |



## Supplementary Table

**Table S1.** The morphological information of small mammals trapped in Johor and Perak, Malaysia.

| No. | Species                               | Voucher No. | Habitat             | Locality        | Sex    | Age       | Microorganism detected        | Strain   | Accession No. | Total number of individuals |
|-----|---------------------------------------|-------------|---------------------|-----------------|--------|-----------|-------------------------------|----------|---------------|-----------------------------|
| 1.  | <i>Rattus tanezumi</i><br>R3 mitotype | KTR003      | Oil palm plantation | Johor, Malaysia | Female | Sub-adult | -                             | -        | -             | 113                         |
| 2.  | <i>Rattus tanezumi</i><br>R3 mitotype | KTR004      | Oil palm plantation | Johor, Malaysia | Male   | Adult     | -                             | -        | -             |                             |
| 3.  | <i>Rattus tanezumi</i><br>R3 mitotype | KTR005      | Oil palm plantation | Johor, Malaysia | Female | Sub-adult | -                             | -        | -             |                             |
| 4.  | <i>Rattus tanezumi</i><br>R3 mitotype | KTR010      | Oil palm plantation | Johor, Malaysia | Male   | Sub-adult | <i>Orientia tsutsugamushi</i> | UM-SNI41 | OP413418      |                             |
| 5.  | <i>Rattus tanezumi</i><br>R3 mitotype | KTR011      | Oil palm plantation | Johor, Malaysia | Female | Adult     | -                             | -        | -             |                             |
| 6.  | <i>Rattus tanezumi</i><br>R3 mitotype | KTR013      | Oil palm plantation | Johor, Malaysia | Female | Juvenile  | -                             | -        | -             |                             |
| 7.  | <i>Rattus tanezumi</i><br>R3 mitotype | KTR021      | Oil palm plantation | Johor, Malaysia | Female | Sub-adult | -                             | -        | -             |                             |
| 8.  | <i>Rattus tanezumi</i><br>R3 mitotype | KTR022      | Oil palm plantation | Johor, Malaysia | Male   | Sub-adult | -                             | -        | -             |                             |
| 9.  | <i>Rattus tanezumi</i><br>R3 mitotype | KTR026      | Oil palm plantation | Johor, Malaysia | Female | Adult     | -                             | -        | -             |                             |
| 10. | <i>Rattus tanezumi</i><br>R3 mitotype | KTR027      | Oil palm plantation | Johor, Malaysia | Female | Adult     | -                             | -        | -             |                             |
| 11. | <i>Rattus tanezumi</i><br>R3 mitotype | KTR028      | Oil palm plantation | Johor, Malaysia | Female | Sub-adult | <i>Orientia tsutsugamushi</i> | UM-SNI42 | OP413419      |                             |
| 12. | <i>Rattus tanezumi</i><br>R3 mitotype | KTR032      | Oil palm plantation | Johor, Malaysia | Male   | Adult     | -                             | -        | -             |                             |
| 13. | <i>Rattus tanezumi</i><br>R3 mitotype | KTR033      | Oil palm plantation | Johor, Malaysia | Female | Sub-adult | -                             | -        | -             |                             |

|     |                                       |        |                        |                    |        |           |                                                                                     |                       |                       |
|-----|---------------------------------------|--------|------------------------|--------------------|--------|-----------|-------------------------------------------------------------------------------------|-----------------------|-----------------------|
| 13. | <i>Rattus tanezumi</i><br>R3 mitotype | KTR033 | Oil palm<br>plantation | Johor,<br>Malaysia | Female | Sub-adult | -                                                                                   | -                     | -                     |
| 14. | <i>Rattus tanezumi</i><br>R3 mitotype | KTR034 | Oil palm<br>plantation | Johor,<br>Malaysia | Female | Sub-adult | <i>Orientia</i><br><i>tsutsugamushi</i>                                             | UM-SNI43              | OP413420              |
| 15. | <i>Rattus tanezumi</i><br>R3 mitotype | KTR035 | Oil palm<br>plantation | Johor,<br>Malaysia | Male   | Adult     | -                                                                                   | -                     | -                     |
| 16. | <i>Rattus tanezumi</i><br>R3 mitotype | KTR037 | Oil palm<br>plantation | Johor,<br>Malaysia | Male   | Adult     | <i>Borrelia</i> sp.<br>(LD)                                                         | UM-SNI16              | OP375130              |
| 17. | <i>Rattus tanezumi</i><br>R3 mitotype | KTR041 | Oil palm<br>plantation | Johor,<br>Malaysia | Female | Adult     | <i>Orientia</i><br><i>tsutsugamushi</i>                                             | UM-SNI46              | OP413423              |
| 18. | <i>Rattus tanezumi</i><br>R3 mitotype | KTR042 | Oil palm<br>plantation | Johor,<br>Malaysia | Male   | Adult     | -                                                                                   | -                     | -                     |
| 19. | <i>Rattus tanezumi</i><br>R3 mitotype | KTR043 | Oil palm<br>plantation | Johor,<br>Malaysia | Male   | Adult     | <i>Bartonella</i><br><i>phoceensis</i> /<br><i>Orientia</i><br><i>tsutsugamushi</i> | UM-SNI04/<br>UM-SNI47 | OP375118/<br>OP413424 |
| 20. | <i>Rattus tanezumi</i><br>R3 mitotype | KTR044 | Oil palm<br>plantation | Johor,<br>Malaysia | Female | Adult     | <i>Borrelia</i> sp.<br>(LD)                                                         | UM-SNI17              | OP375131              |
| 21. | <i>Rattus tanezumi</i><br>R3 mitotype | KTR045 | Oil palm<br>plantation | Johor,<br>Malaysia | Female | Adult     | <i>Orientia</i><br><i>tsutsugamushi</i>                                             | UM-SNI48              | OP413425              |
| 22. | <i>Rattus tanezumi</i><br>R3 mitotype | KTR058 | Oil palm<br>plantation | Johor,<br>Malaysia | Male   | Sub-adult | -                                                                                   | -                     | -                     |
| 23. | <i>Rattus tanezumi</i><br>R3 mitotype | KTR059 | Oil palm<br>plantation | Johor,<br>Malaysia | Male   | Adult     | -                                                                                   | -                     | -                     |
| 24. | <i>Rattus tanezumi</i><br>R3 mitotype | KTR060 | Oil palm<br>plantation | Johor,<br>Malaysia | Male   | Adult     | -                                                                                   | -                     | -                     |
| 25. | <i>Rattus tanezumi</i><br>R3 mitotype | KTR061 | Oil palm<br>plantation | Johor,<br>Malaysia | Female | Adult     | -                                                                                   | -                     | -                     |
| 26. | <i>Rattus tanezumi</i><br>R3 mitotype | KTR063 | Oil palm<br>plantation | Johor,<br>Malaysia | Male   | Juvenile  | -                                                                                   | -                     | -                     |
| 27. | <i>Rattus tanezumi</i><br>R3 mitotype | KTR068 | Oil palm<br>plantation | Johor,<br>Malaysia | Female | Adult     | -                                                                                   | -                     | -                     |

|     |                                       |        |                        |                    |        |           |                                         |          |          |
|-----|---------------------------------------|--------|------------------------|--------------------|--------|-----------|-----------------------------------------|----------|----------|
| 28. | <i>Rattus tanezumi</i><br>R3 mitotype | KTR069 | Oil palm<br>plantation | Johor,<br>Malaysia | Male   | Adult     | <i>Borrelia</i> sp.<br>(LD)             | UM-SNI18 | OP375132 |
| 29. | <i>Rattus tanezumi</i><br>R3 mitotype | KTR070 | Oil palm<br>plantation | Johor,<br>Malaysia | Female | Adult     | -                                       | -        | -        |
| 30. | <i>Rattus tanezumi</i><br>R3 mitotype | KTR071 | Oil palm<br>plantation | Johor,<br>Malaysia | Female | Sub-adult | <i>Orientia</i><br><i>tsutsugamushi</i> | UM-SNI50 | OP413427 |
| 31. | <i>Rattus tanezumi</i><br>R3 mitotype | KTR072 | Oil palm<br>plantation | Johor,<br>Malaysia | Female | Adult     | -                                       | -        | -        |
| 32. | <i>Rattus tanezumi</i><br>R3 mitotype | KTR073 | Oil palm<br>plantation | Johor,<br>Malaysia | Male   | Juvenile  | -                                       | -        | -        |
| 33. | <i>Rattus tanezumi</i><br>R3 mitotype | KTR074 | Oil palm<br>plantation | Johor,<br>Malaysia | Female | Juvenile  | -                                       | -        | -        |
| 34. | <i>Rattus tanezumi</i><br>R3 mitotype | KTR075 | Oil palm<br>plantation | Johor,<br>Malaysia | Male   | Juvenile  | -                                       | -        | -        |
| 35. | <i>Rattus tanezumi</i><br>R3 mitotype | KTR077 | Oil palm<br>plantation | Johor,<br>Malaysia | Male   | Juvenile  | -                                       | -        | -        |
| 36. | <i>Rattus tanezumi</i><br>R3 mitotype | KTR078 | Oil palm<br>plantation | Johor,<br>Malaysia | Male   | Sub-adult | -                                       | -        | -        |
| 37. | <i>Rattus tanezumi</i><br>R3 mitotype | KTR079 | Oil palm<br>plantation | Johor,<br>Malaysia | Female | Adult     | -                                       | -        | -        |
| 38. | <i>Rattus tanezumi</i><br>R3 mitotype | KTR080 | Oil palm<br>plantation | Johor,<br>Malaysia | Female | Adult     | -                                       | -        | -        |
| 39. | <i>Rattus tanezumi</i><br>R3 mitotype | KTR081 | Oil palm<br>plantation | Johor,<br>Malaysia | Female | Adult     | -                                       | -        | -        |
| 40. | <i>Rattus tanezumi</i><br>R3 mitotype | KTR082 | Oil palm<br>plantation | Johor,<br>Malaysia | Female | Adult     | -                                       | -        | -        |
| 41. | <i>Rattus tanezumi</i><br>R3 mitotype | KTR083 | Oil palm<br>plantation | Johor,<br>Malaysia | Female | Adult     | -                                       | -        | -        |
| 42. | <i>Rattus tanezumi</i><br>R3 mitotype | KTR086 | Oil palm<br>plantation | Johor,<br>Malaysia | Female | Adult     | -                                       | -        | -        |
| 43. | <i>Rattus tanezumi</i><br>R3 mitotype | KTR087 | Oil palm<br>plantation | Johor,<br>Malaysia | Male   | Adult     | -                                       | -        | -        |

|     |                                       |         |                        |                    |        |           |                                  |                       |                       |
|-----|---------------------------------------|---------|------------------------|--------------------|--------|-----------|----------------------------------|-----------------------|-----------------------|
| 44. | <i>Rattus tanezumi</i><br>R3 mitotype | KTR093  | Oil palm<br>plantation | Johor,<br>Malaysia | Male   | Adult     | -                                | -                     | -                     |
| 45. | <i>Rattus tanezumi</i><br>R3 mitotype | KTR094  | Oil palm<br>plantation | Johor,<br>Malaysia | Female | Adult     | -                                | -                     | -                     |
| 46. | <i>Rattus tanezumi</i><br>R3 mitotype | KTR095  | Oil palm<br>plantation | Johor,<br>Malaysia | Female | Adult     | -                                | -                     | -                     |
| 47. | <i>Rattus tanezumi</i><br>R3 mitotype | KTR096  | Oil palm<br>plantation | Johor,<br>Malaysia | Male   | Adult     | -                                | -                     | -                     |
| 48. | <i>Rattus tanezumi</i><br>R3 mitotype | KTR097  | Oil palm<br>plantation | Johor,<br>Malaysia | Male   | Sub-adult | -                                | -                     | -                     |
| 49. | <i>Rattus tanezumi</i><br>R3 mitotype | KTR098  | Oil palm<br>plantation | Johor,<br>Malaysia | Female | Adult     | -                                | -                     | -                     |
| 50. | <i>Rattus tanezumi</i><br>R3 mitotype | KTR099  | Oil palm<br>plantation | Johor,<br>Malaysia | Male   | Juvenile  | -                                | -                     | -                     |
| 51. | <i>Rattus tanezumi</i><br>R3 mitotype | KTR101  | Oil palm<br>plantation | Johor,<br>Malaysia | Female | Juvenile  | -                                | -                     | -                     |
| 52. | <i>Rattus tanezumi</i><br>R3 mitotype | THTR003 | Paddy<br>field         | Perak,<br>Malaysia | Male   | -         | -                                | -                     | -                     |
| 53. | <i>Rattus tanezumi</i><br>R3 mitotype | THTR004 | Oil palm<br>plantation | Perak,<br>Malaysia | Female | Adult     | <i>Bartonella<br/>phoceensis</i> | UM-SNI05              | OP375119              |
| 54. | <i>Rattus tanezumi</i><br>R3 mitotype | THTR005 | Oil palm<br>plantation | Perak,<br>Malaysia | Female | Adult     | -                                | -                     | -                     |
| 55. | <i>Rattus tanezumi</i><br>R3 mitotype | THTR006 | Residential<br>area    | Perak,<br>Malaysia | Male   | Adult     | <i>Bartonella<br/>phoceensis</i> | UM-SNI06              | OP375120              |
| 56. | <i>Rattus tanezumi</i><br>R3 mitotype | THTR007 | Residential<br>area    | Perak,<br>Malaysia | Male   | Sub-adult | <i>Bartonella<br/>phoceensis</i> | UM-SNI07              | OP375121              |
| 57. | <i>Rattus tanezumi</i><br>R3 mitotype | THTR008 | Residential<br>area    | Perak,<br>Malaysia | Female | Adult     | <i>Bartonella<br/>phoceensis</i> | UM-SNI08              | OP375122              |
| 58. | <i>Rattus tanezumi</i><br>R3 mitotype | THTR009 | Residential<br>area    | Perak,<br>Malaysia | Female | Sub-adult | -                                | -                     | -                     |
| 59. | <i>Rattus tanezumi</i><br>R3 mitotype | THTR010 | Residential<br>area    | Perak,<br>Malaysia | Female | Adult     | <i>Bartonella<br/>phoceensis</i> | UM-SNI09/<br>UM-SNI26 | OP375122/<br>OP413403 |



|     |                                       |         |                        |                    |        |           |                                                                  |                       |                       |
|-----|---------------------------------------|---------|------------------------|--------------------|--------|-----------|------------------------------------------------------------------|-----------------------|-----------------------|
|     |                                       |         |                        |                    |        |           | <i>Orientia<br/>tsutsugamushi</i>                                |                       |                       |
| 60. | <i>Rattus tanezumi</i><br>R3 mitotype | THTR013 | Residential<br>area    | Perak,<br>Malaysia | Female | Adult     | -                                                                | -                     | -                     |
| 61. | <i>Rattus tanezumi</i><br>R3 mitotype | THTR015 | Oil palm<br>plantation | Perak,<br>Malaysia | Male   | Adult     | -                                                                | -                     | -                     |
| 62. | <i>Rattus tanezumi</i><br>R3 mitotype | THTR016 | Oil palm<br>plantation | Perak,<br>Malaysia | Male   | Adult     | -                                                                | -                     | -                     |
| 63. | <i>Rattus tanezumi</i><br>R3 mitotype | THTR019 | Oil palm<br>plantation | Perak,<br>Malaysia | Male   | Adult     | -                                                                | -                     | -                     |
| 64. | <i>Rattus tanezumi</i><br>R3 mitotype | THTR042 | Oil palm<br>plantation | Perak,<br>Malaysia | Female | Adult     | <i>Orientia<br/>tsutsugamushi</i>                                | UM-SNI29              | OP413406              |
| 65. | <i>Rattus tanezumi</i><br>R3 mitotype | THTR043 | Oil palm<br>plantation | Perak,<br>Malaysia | Female | Adult     | <i>Bartonella<br/>phoceensis/<br/>Orientia<br/>tsutsugamushi</i> | UM-SNI11/<br>UM-SNI30 | OP375125/<br>OP413407 |
| 66. | <i>Rattus tanezumi</i><br>R3 mitotype | THTR044 | Oil palm<br>plantation | Perak,<br>Malaysia | Female | Adult     | -                                                                | -                     | -                     |
| 67. | <i>Rattus tanezumi</i><br>R3 mitotype | THTR046 | Oil palm<br>plantation | Perak,<br>Malaysia | Male   | Sub-adult | <i>Bartonella<br/>phoceensis/<br/>Orientia<br/>tsutsugamushi</i> | UM-SNI12/<br>UM-SNI33 | OP375126/<br>OP413410 |
| 68. | <i>Rattus tanezumi</i><br>R3 mitotype | THTR047 | Oil palm<br>plantation | Perak,<br>Malaysia | Male   | Adult     | <i>Orientia<br/>tsutsugamushi</i>                                | UM-SNI34              | OP413411              |
| 69. | <i>Rattus tanezumi</i><br>R3 mitotype | THTR048 | Oil palm<br>plantation | Perak,<br>Malaysia | Female | Sub-adult | <i>Bartonella<br/>phoceensis/<br/>Orientia<br/>tsutsugamushi</i> | UM-SNI13/<br>UM-SNI35 | OP375127/<br>OP413412 |
| 70. | <i>Rattus tanezumi</i><br>R3 mitotype | THTR110 | Residential<br>area    | Perak,<br>Malaysia | Male   | Adult     | -                                                                | -                     | -                     |
| 71. | <i>Rattus tanezumi</i><br>R3 mitotype | THTR112 | Oil palm<br>plantation | Perak,<br>Malaysia | Male   | Adult     | -                                                                | -                     | -                     |

|     |                                       |         |                        |                    |        |           |                                         |          |          |
|-----|---------------------------------------|---------|------------------------|--------------------|--------|-----------|-----------------------------------------|----------|----------|
| 72. | <i>Rattus tanezumi</i><br>R3 mitotype | THTR113 | Oil palm<br>plantation | Perak,<br>Malaysia | Female | Sub-adult | -                                       | -        | -        |
| 73. | <i>Rattus tanezumi</i><br>R3 mitotype | THTR114 | Oil palm<br>plantation | Perak,<br>Malaysia | Female | Adult     | -                                       | -        | -        |
| 74. | <i>Rattus tanezumi</i><br>R3 mitotype | THTR115 | Oil palm<br>plantation | Perak,<br>Malaysia | Male   | Adult     | -                                       | -        | -        |
| 75. | <i>Rattus tanezumi</i><br>R3 mitotype | THTR118 | Oil palm<br>plantation | Perak,<br>Malaysia | Male   | Adult     | -                                       | -        | -        |
| 76. | <i>Rattus tanezumi</i><br>R3 mitotype | THTR119 | Oil palm<br>plantation | Perak,<br>Malaysia | Male   | Juvenile  | -                                       | -        | -        |
| 77. | <i>Rattus tanezumi</i><br>R3 mitotype | THTR120 | Oil palm<br>plantation | Perak,<br>Malaysia | Male   | Adult     | <i>Borrelia</i> sp. (RF)                | UM-SNI21 | OP375135 |
| 78. | <i>Rattus tanezumi</i><br>R3 mitotype | THTR121 | Oil palm<br>plantation | Perak,<br>Malaysia | Female | Adult     | -                                       | -        | -        |
| 79. | <i>Rattus tanezumi</i><br>R3 mitotype | THTR123 | Paddy<br>field         | Perak,<br>Malaysia | Female | Sub-adult | -                                       | -        | -        |
| 80. | <i>Rattus tanezumi</i><br>R3 mitotype | THTR125 | Oil palm<br>plantation | Perak,<br>Malaysia | Male   | Sub-adult | -                                       | -        | -        |
| 81. | <i>Rattus tanezumi</i><br>R3 mitotype | THTR126 | Oil palm<br>plantation | Perak,<br>Malaysia | Female | Adult     | -                                       | -        | -        |
| 82. | <i>Rattus tanezumi</i><br>R3 mitotype | THTR127 | Oil palm<br>plantation | Perak,<br>Malaysia | Female | Adult     | -                                       | -        | -        |
| 83. | <i>Rattus tanezumi</i><br>R3 mitotype | THTR128 | Oil palm<br>plantation | Perak,<br>Malaysia | Male   | Adult     | <i>Borrelia</i> sp. (RF)                | UM-SNI22 | OP375136 |
| 84. | <i>Rattus tanezumi</i><br>R3 mitotype | THTR129 | Oil palm<br>plantation | Perak,<br>Malaysia | Male   | Juvenile  | -                                       | -        | -        |
| 85. | <i>Rattus tanezumi</i><br>R3 mitotype | THTR133 | Oil palm<br>plantation | Perak,<br>Malaysia | Male   | Adult     | <i>Orientia</i><br><i>tsutsugamushi</i> | UM-SNI36 | OP413413 |
| 86. | <i>Rattus tanezumi</i><br>R3 mitotype | THTR134 | Oil palm<br>plantation | Perak,<br>Malaysia | Female | Adult     | -                                       | -        | -        |
| 87. | <i>Rattus tanezumi</i><br>R3 mitotype | THTR136 | Residential<br>area    | Perak,<br>Malaysia | Female | Sub-adult | -                                       | -        | -        |

|      |                                       |         |                        |                    |        |           |                                 |          |          |
|------|---------------------------------------|---------|------------------------|--------------------|--------|-----------|---------------------------------|----------|----------|
| 88.  | <i>Rattus tanezumi</i><br>R3 mitotype | THTR138 | Residential<br>area    | Perak,<br>Malaysia | Male   | Adult     | -                               | -        | -        |
| 89.  | <i>Rattus tanezumi</i><br>R3 mitotype | THTR139 | Residential<br>area    | Perak,<br>Malaysia | Female | Adult     | -                               | -        | -        |
| 90.  | <i>Rattus tanezumi</i><br>R3 mitotype | THTR140 | Oil palm<br>plantation | Perak,<br>Malaysia | Female | Adult     | -                               | -        | -        |
| 91.  | <i>Rattus tanezumi</i><br>R3 mitotype | THTR141 | Oil palm<br>plantation | Perak,<br>Malaysia | Female | Adult     | -                               | -        | -        |
| 92.  | <i>Rattus tanezumi</i><br>R3 mitotype | THTR142 | Residential<br>area    | Perak,<br>Malaysia | Male   | Adult     | <i>Borrelia<br/>burgdorferi</i> | UM-SNI15 | OP375129 |
| 93.  | <i>Rattus tanezumi</i><br>R3 mitotype | THTR143 | Residential<br>area    | Perak,<br>Malaysia | Male   | Adult     | -                               | -        | -        |
| 94.  | <i>Rattus tanezumi</i><br>R3 mitotype | THTR145 | Oil palm<br>plantation | Perak,<br>Malaysia | Male   | Adult     | -                               | -        | -        |
| 95.  | <i>Rattus tanezumi</i><br>R3 mitotype | THTR146 | Oil palm<br>plantation | Perak,<br>Malaysia | Female | Adult     | -                               | -        | -        |
| 96.  | <i>Rattus tanezumi</i><br>R3 mitotype | THTR147 | Oil palm<br>plantation | Perak,<br>Malaysia | Male   | Adult     | -                               | -        | -        |
| 97.  | <i>Rattus tanezumi</i><br>R3 mitotype | THTR148 | Oil palm<br>plantation | Perak,<br>Malaysia | Male   | Adult     | -                               | -        | -        |
| 98.  | <i>Rattus tanezumi</i><br>R3 mitotype | THTR149 | Oil palm<br>plantation | Perak,<br>Malaysia | Female | Adult     | -                               | -        | -        |
| 99.  | <i>Rattus tanezumi</i><br>R3 mitotype | THTR153 | Oil palm<br>plantation | Perak,<br>Malaysia | Male   | Juvenile  | -                               | -        | -        |
| 100. | <i>Rattus tanezumi</i><br>R3 mitotype | THTR157 | Residential<br>area    | Perak,<br>Malaysia | Male   | Adult     | -                               | -        | -        |
| 101. | <i>Rattus tanezumi</i><br>R3 mitotype | THTR158 | Residential<br>area    | Perak,<br>Malaysia | Male   | Sub-adult | -                               | -        | -        |
| 102. | <i>Rattus tanezumi</i><br>R3 mitotype | THTR159 | Oil palm<br>plantation | Perak,<br>Malaysia | Female | Sub-adult | -                               | -        | -        |
| 103. | <i>Rattus tanezumi</i><br>R3 mitotype | THTR160 | Oil palm<br>plantation | Perak,<br>Malaysia | Female | Adult     | -                               | -        | -        |

|      |                                       |         |                        |                    |        |           |                                         |          |          |
|------|---------------------------------------|---------|------------------------|--------------------|--------|-----------|-----------------------------------------|----------|----------|
| 104. | <i>Rattus tanezumi</i><br>R3 mitotype | THTR161 | Oil palm<br>plantation | Perak,<br>Malaysia | Female | Adult     | -                                       | -        | -        |
| 105. | <i>Rattus tanezumi</i><br>R3 mitotype | THTR162 | Oil palm<br>plantation | Perak,<br>Malaysia | Female | Adult     | <i>Borrelia</i> sp. (RF)                | UM-SNI24 | OP537179 |
| 106. | <i>Rattus tanezumi</i><br>R3 mitotype | THTR163 | Oil palm<br>plantation | Perak,<br>Malaysia | Male   | Adult     | -                                       | -        | -        |
| 107. | <i>Rattus tanezumi</i><br>R3 mitotype | THTR164 | Oil palm<br>plantation | Perak,<br>Malaysia | Female | Adult     | <i>Orientia</i><br><i>tsutsugamushi</i> | UM-SNI38 | OP413415 |
| 108. | <i>Rattus tanezumi</i><br>R3 mitotype | THTR165 | Oil palm<br>plantation | Perak,<br>Malaysia | Female | Sub-adult | -                                       | -        | -        |
| 109. | <i>Rattus tanezumi</i><br>R3 mitotype | THTR167 | Oil palm<br>plantation | Perak,<br>Malaysia | Female | Adult     | -                                       | -        | -        |
| 110. | <i>Rattus tanezumi</i><br>R3 mitotype | THTR168 | Oil palm<br>plantation | Perak,<br>Malaysia | Male   | Adult     | -                                       | -        | -        |
| 111. | <i>Rattus tanezumi</i><br>R3 mitotype | THTR170 | Oil palm<br>plantation | Perak,<br>Malaysia | Female | Adult     | <i>Orientia</i><br><i>tsutsugamushi</i> | UM-SNI39 | OP413416 |
| 112. | <i>Rattus tanezumi</i><br>R3 mitotype | THTR171 | Oil palm<br>plantation | Perak,<br>Malaysia | Male   | Adult     | <i>Orientia</i><br><i>tsutsugamushi</i> | UM-SNI40 | OP413417 |
| 113. | <i>Rattus tanezumi</i><br>R3 mitotype | THTR172 | Oil palm<br>plantation | Perak,<br>Malaysia | Male   | Adult     | -                                       | -        | -        |
| 114. | <i>Rattus tanezumi</i><br>R3 mitotype | THTR173 | Oil palm<br>plantation | Perak,<br>Malaysia | Male   | Adult     | -                                       | -        | -        |
| 115. | <i>Rattus tanezumi</i><br>R3 mitotype | THTR174 | Oil palm<br>plantation | Perak,<br>Malaysia | Female | Sub-adult | <i>Borrelia</i> sp. (RF)                | UM-SNI25 | OP375138 |
| 116. | <i>Rattus</i><br><i>argentiater</i>   | THTR001 | Paddy<br>field         | Perak,<br>Malaysia | Female | Sub-adult | -                                       | -        | -        |
| 117. | <i>Rattus</i><br><i>argentiater</i>   | THTR020 | Paddy<br>field         | Perak,<br>Malaysia | Female | Sub-adult | -                                       | -        | -        |
| 118. | <i>Rattus</i><br><i>argentiater</i>   | THTR021 | Paddy<br>field         | Perak,<br>Malaysia | Female | Sub-adult | -                                       | -        | -        |
| 119. | <i>Rattus</i><br><i>argentiater</i>   | THTR022 | Paddy<br>field         | Perak,<br>Malaysia | Male   | Adult     | <i>Bartonella</i><br><i>phoceensis</i>  | UM-SNI10 | OP375124 |

|      |                             |         |                     |                 |        |           |                               |          |          |
|------|-----------------------------|---------|---------------------|-----------------|--------|-----------|-------------------------------|----------|----------|
| 120. | <i>Rattus argentiventer</i> | THTR023 | Paddy field         | Perak, Malaysia | Male   | Adult     | -                             | -        | -        |
| 121. | <i>Rattus argentiventer</i> | THTR025 | Paddy field         | Perak, Malaysia | Female | Sub-adult | -                             | -        | -        |
| 122. | <i>Rattus argentiventer</i> | THTR026 | Paddy field         | Perak, Malaysia | Male   | Sub-adult | -                             | -        | -        |
| 123. | <i>Rattus argentiventer</i> | THTR027 | Paddy field         | Perak, Malaysia | Female | Adult     | -                             | -        | -        |
| 124. | <i>Rattus argentiventer</i> | THTR028 | Paddy field         | Perak, Malaysia | Female | Sub-adult | -                             | -        | -        |
| 125. | <i>Rattus argentiventer</i> | THTR029 | Paddy field         | Perak, Malaysia | Female | Sub-adult | -                             | -        | -        |
| 126. | <i>Rattus argentiventer</i> | THTR030 | Paddy field         | Perak, Malaysia | Male   | Adult     | -                             | -        | -        |
| 127. | <i>Rattus argentiventer</i> | THTR031 | Paddy field         | Perak, Malaysia | Male   | Adult     | -                             | -        | -        |
| 128. | <i>Rattus argentiventer</i> | THTR032 | Paddy field         | Perak, Malaysia | Female | Sub-adult | -                             | -        | -        |
| 129. | <i>Rattus argentiventer</i> | THTR033 | Paddy field         | Perak, Malaysia | Male   | Adult     | -                             | -        | -        |
| 130. | <i>Rattus argentiventer</i> | THTR034 | Paddy field         | Perak, Malaysia | Female | Adult     | -                             | -        | -        |
| 131. | <i>Rattus argentiventer</i> | THTR035 | Paddy field         | Perak, Malaysia | Female | Sub-adult | -                             | -        | -        |
| 132. | <i>Rattus argentiventer</i> | THTR036 | Paddy field         | Perak, Malaysia | Female | Adult     | <i>Orientia tsutsugamushi</i> | UM-SNI27 | OP413404 |
| 133. | <i>Rattus argentiventer</i> | THTR037 | Oil palm plantation | Perak, Malaysia | Male   | Adult     | -                             | -        | -        |
| 134. | <i>Rattus argentiventer</i> | THTR038 | Oil palm plantation | Perak, Malaysia | Female | Adult     | -                             | -        | -        |
| 135. | <i>Rattus argentiventer</i> | THTR039 | Oil palm plantation | Perak, Malaysia | Female | Sub-adult | -                             | -        | -        |



|      |                             |         |                     |                 |        |           |                               |          |          |    |
|------|-----------------------------|---------|---------------------|-----------------|--------|-----------|-------------------------------|----------|----------|----|
| 136. | <i>Rattus argentiventer</i> | THTR107 | Paddy field         | Perak, Malaysia | Male   | Adult     | -                             | -        | -        |    |
| 137. | <i>Rattus argentiventer</i> | THTR122 | Paddy field         | Perak, Malaysia | Male   | Sub-adult | -                             | -        | -        |    |
| 138. | <i>Rattus argentiventer</i> | THTR124 | Paddy field         | Perak, Malaysia | Male   | Adult     | -                             | -        | -        |    |
| 139. | <i>Rattus argentiventer</i> | THTR155 | Paddy field         | Perak, Malaysia | Male   | Adult     | -                             | -        | -        |    |
| 140. | <i>Rattus argentiventer</i> | THTR156 | Paddy field         | Perak, Malaysia | Male   | Adult     | <i>Orientia tsutsugamushi</i> | UM-SNI37 | OP413414 |    |
| 141. | <i>Rattus tiomanicus</i>    | KTR001  | Oil palm plantation | Johor, Malaysia | Female | Adult     | -                             | -        | -        | 22 |
| 142. | <i>Rattus tiomanicus</i>    | KTR002  | Oil palm plantation | Johor, Malaysia | Male   | -         | -                             | -        | -        |    |
| 143. | <i>Rattus tiomanicus</i>    | KTR006  | Oil palm plantation | Johor, Malaysia | Male   | Juvenile  | -                             | -        | -        |    |
| 144. | <i>Rattus tiomanicus</i>    | KTR012  | Oil palm plantation | Johor, Malaysia | Female | Adult     | -                             | -        | -        |    |
| 145. | <i>Rattus tiomanicus</i>    | KTR023  | Oil palm plantation | Johor, Malaysia | Female | Juvenile  | -                             | -        | -        |    |
| 146. | <i>Rattus tiomanicus</i>    | KTR024  | Oil palm plantation | Johor, Malaysia | Male   | Adult     | -                             | -        | -        |    |
| 147. | <i>Rattus tiomanicus</i>    | KTR029  | Oil palm plantation | Johor, Malaysia | Male   | Juvenile  | -                             | -        | -        |    |
| 148. | <i>Rattus tiomanicus</i>    | KTR036  | Oil palm plantation | Johor, Malaysia | Female | Adult     | <i>Orientia tsutsugamushi</i> | UM-SNI44 | OP413421 |    |
| 149. | <i>Rattus tiomanicus</i>    | KTR046  | Oil palm plantation | Johor, Malaysia | Male   | Juvenile  | -                             | -        | -        |    |
| 150. | <i>Rattus tiomanicus</i>    | KTR062  | Oil palm plantation | Johor, Malaysia | Female | Adult     | -                             | -        | -        |    |
| 151. | <i>Rattus tiomanicus</i>    | KTR065  | Oil palm plantation | Johor, Malaysia | Male   | Juvenile  | -                             | -        | -        |    |

|      |                          |         |                     |                 |        |           |                          |          |          |
|------|--------------------------|---------|---------------------|-----------------|--------|-----------|--------------------------|----------|----------|
| 152. | <i>Rattus tiomanicus</i> | KTR076  | Oil palm plantation | Johor, Malaysia | Male   | Juvenile  | -                        | -        | -        |
| 153. | <i>Rattus tiomanicus</i> | THTR012 | Residential area    | Perak, Malaysia | Female | Adult     | -                        | -        | -        |
| 154. | <i>Rattus tiomanicus</i> | THTR017 | Oil palm plantation | Perak, Malaysia | Female | Juvenile  | -                        | -        | -        |
| 155. | <i>Rattus tiomanicus</i> | THTR018 | Oil palm plantation | Perak, Malaysia | Female | Sub-adult | -                        | -        | -        |
| 156. | <i>Rattus tiomanicus</i> | THTR040 | Residential area    | Perak, Malaysia | Female | Adult     | -                        | -        | -        |
| 157. | <i>Rattus tiomanicus</i> | THTR116 | Oil palm plantation | Perak, Malaysia | Female | Sub-adult | -                        | -        | -        |
| 158. | <i>Rattus tiomanicus</i> | THTR117 | Oil palm plantation | Perak, Malaysia | Male   | Juvenile  | -                        | -        | -        |
| 159. | <i>Rattus tiomanicus</i> | THTR137 | Residential area    | Perak, Malaysia | Male   | Adult     | -                        | -        | -        |
| 160. | <i>Rattus tiomanicus</i> | THTR150 | Oil palm plantation | Perak, Malaysia | Female | Adult     | <i>Borrelia</i> sp. (RF) | UM-SNI23 | OP375137 |
| 161. | <i>Rattus tiomanicus</i> | THTR166 | Oil palm plantation | Perak, Malaysia | Female | Adult     | -                        | -        | -        |
| 162. | <i>Rattus tiomanicus</i> | THTR175 | Oil palm plantation | Perak, Malaysia | Female | Juvenile  | -                        | -        | -        |
| 163. | <i>Rattus exulans</i>    | KTR007  | Oil palm plantation | Johor, Malaysia | Female | Adult     | -                        | -        | -        |
| 164. | <i>Rattus exulans</i>    | KTR008  | Oil palm plantation | Johor, Malaysia | Female | Adult     | -                        | -        | -        |
| 165. | <i>Rattus exulans</i>    | KTR064  | Oil palm plantation | Johor, Malaysia |        |           | -                        | -        | -        |
| 166. | <i>Rattus exulans</i>    | THTR002 | Paddy field         | Perak, Malaysia | Male   | Adult     | -                        | -        | -        |
| 167. | <i>Rattus exulans</i>    | THTR014 | Residential area    | Perak, Malaysia | Male   | Juvenile  | -                        | -        | -        |

|      |                                      |         |                     |                 |        |           |                               |          |          |    |
|------|--------------------------------------|---------|---------------------|-----------------|--------|-----------|-------------------------------|----------|----------|----|
| 168. | <i>Rattus exulans</i>                | THTR024 | Paddy field         | Perak, Malaysia | Male   | Adult     | -                             | -        | -        |    |
| 169. | <i>Rattus exulans</i>                | THTR041 | Oil palm plantation | Perak, Malaysia | Male   | Adult     | <i>Orientia tsutsugamushi</i> | UM-SNI28 | OP413405 |    |
| 170. | <i>Rattus exulans</i>                | THTR045 | Oil palm plantation | Perak, Malaysia | Male   | Adult     | -                             | -        | -        |    |
| 171. | <i>Rattus exulans</i>                | THTR109 | Residential area    | Perak, Malaysia | Male   | Adult     | -                             | -        | -        |    |
| 172. | <i>Rattus exulans</i>                | THTR131 | Oil palm plantation | Perak, Malaysia | Female | Adult     | -                             | -        | -        |    |
| 173. | <i>Rattus exulans</i>                | THTR152 | Oil palm plantation | Perak, Malaysia | Male   | Sub-adult | -                             | -        | -        |    |
| 174. | <i>Rattus exulans</i>                | THTR169 | Oil palm plantation | Perak, Malaysia | Male   | Juvenile  | -                             | -        | -        |    |
| 175. | <i>Rattus exulans</i>                | THTR176 | Oil palm plantation | Perak, Malaysia | Female | -         | -                             | -        | -        |    |
| 176. | <i>Rattus tanezumi sensu stricto</i> | THTR108 | Paddy field         | Perak, Malaysia | Female | Adult     | -                             | -        | -        | 1  |
| 177. | <i>Tupaia glis</i>                   | THTR011 | Residential area    | Perak, Malaysia | Female | Adult     | -                             | -        | -        | 40 |
| 178. | <i>Tupaia glis</i>                   | THTR111 | Residential area    | Perak, Malaysia | Female | Adult     | <i>Borrelia</i> sp. (RF)      | UM-SNI20 | OP375134 |    |
| 179. | <i>Tupaia glis</i>                   | THTR130 | Oil palm plantation | Perak, Malaysia | Male   | Adult     | -                             | -        | -        |    |
| 180. | <i>Tupaia glis</i>                   | THTR132 | Oil palm plantation | Perak, Malaysia | Male   | Adult     | -                             | -        | -        |    |
| 181. | <i>Tupaia glis</i>                   | THTR135 | Residential area    | Perak, Malaysia | Male   | Adult     | -                             | -        | -        |    |
| 182. | <i>Tupaia glis</i>                   | THTR144 | Residential area    | Perak, Malaysia | Male   | Adult     | -                             | -        | -        |    |
| 183. | <i>Tupaia glis</i>                   | THTR151 | Oil palm plantation | Perak, Malaysia | Female | Adult     | -                             | -        | -        |    |

|      |                    |        |                     |                 |        |           |                               |          |          |
|------|--------------------|--------|---------------------|-----------------|--------|-----------|-------------------------------|----------|----------|
| 184. | <i>Tupaia glis</i> | KTR009 | Oil palm plantation | Johor, Malaysia | Female | Adult     | -                             | -        | -        |
| 185. | <i>Tupaia glis</i> | KTR014 | Oil palm plantation | Johor, Malaysia | Female | Adult     | -                             | -        | -        |
| 186. | <i>Tupaia glis</i> | KTR015 | Oil palm plantation | Johor, Malaysia | Female | Adult     | -                             | -        | -        |
| 187. | <i>Tupaia glis</i> | KTR016 | Oil palm plantation | Johor, Malaysia | Male   | Adult     | -                             | -        | -        |
| 188. | <i>Tupaia glis</i> | KTR017 | Oil palm plantation | Johor, Malaysia | Female | Adult     | -                             | -        | -        |
| 189. | <i>Tupaia glis</i> | KTR018 | Oil palm plantation | Johor, Malaysia | Male   | Adult     | -                             | -        | -        |
| 190. | <i>Tupaia glis</i> | KTR019 | Oil palm plantation | Johor, Malaysia | Male   | Adult     | -                             | -        | -        |
| 191. | <i>Tupaia glis</i> | KTR020 | Oil palm plantation | Johor, Malaysia | Male   | Sub-adult | -                             | -        | -        |
| 192. | <i>Tupaia glis</i> | KTR025 | Oil palm plantation | Johor, Malaysia | Male   | Adult     | -                             | -        | -        |
| 193. | <i>Tupaia glis</i> | KTR030 | Oil palm plantation | Johor, Malaysia | Male   | Adult     | -                             | -        | -        |
| 194. | <i>Tupaia glis</i> | KTR031 | Oil palm plantation | Johor, Malaysia | Female | Adult     | -                             | -        | -        |
| 195. | <i>Tupaia glis</i> | KTR038 | Oil palm plantation | Johor, Malaysia | Male   | Adult     | -                             | -        | -        |
| 196. | <i>Tupaia glis</i> | KTR039 | Oil palm plantation | Johor, Malaysia | Female | Adult     | <i>Orientia tsutsugamushi</i> | UM-SNI45 | OP413422 |
| 197. | <i>Tupaia glis</i> | KTR040 | Oil palm plantation | Johor, Malaysia | Male   | Adult     | -                             | -        | -        |
| 198. | <i>Tupaia glis</i> | KTR047 | Oil palm plantation | Johor, Malaysia | Female | Adult     | -                             | -        | -        |
| 199. | <i>Tupaia glis</i> | KTR048 | Oil palm plantation | Johor, Malaysia | Male   | Adult     | -                             | -        | -        |

|      |                    |        |                     |                 |        |           |                      |          |          |
|------|--------------------|--------|---------------------|-----------------|--------|-----------|----------------------|----------|----------|
| 200. | <i>Tupaia glis</i> | KTR049 | Oil palm plantation | Johor, Malaysia | Female | Adult     | -                    | -        | -        |
| 201. | <i>Tupaia glis</i> | KTR050 | Oil palm plantation | Johor, Malaysia | Female | Adult     | -                    | -        | -        |
| 202. | <i>Tupaia glis</i> | KTR051 | Oil palm plantation | Johor, Malaysia | Female | Adult     | -                    | -        | -        |
| 203. | <i>Tupaia glis</i> | KTR052 | Oil palm plantation | Johor, Malaysia | Male   | Adult     | <i>Orientia</i>      | UM-SNI49 | OP413426 |
| 204. | <i>Tupaia glis</i> | KTR053 | Oil palm plantation | Johor, Malaysia | Male   | Adult     | <i>tsutsugamushi</i> | -        | -        |
| 205. | <i>Tupaia glis</i> | KTR054 | Oil palm plantation | Johor, Malaysia | Male   | Adult     | -                    | -        | -        |
| 206. | <i>Tupaia glis</i> | KTR055 | Oil palm plantation | Johor, Malaysia | Male   | Adult     | -                    | -        | -        |
| 207. | <i>Tupaia glis</i> | KTR056 | Oil palm plantation | Johor, Malaysia | Male   | Adult     | -                    | -        | -        |
| 208. | <i>Tupaia glis</i> | KTR057 | Oil palm plantation | Johor, Malaysia | Female | Juvenile  |                      |          | -        |
| 209. | <i>Tupaia glis</i> | KTR066 | Oil palm plantation | Johor, Malaysia | Male   | Sub-adult | -                    | -        | -        |
| 210. | <i>Tupaia glis</i> | KTR067 | Oil palm plantation | Johor, Malaysia | Male   | Adult     | -                    | -        | -        |
| 211. | <i>Tupaia glis</i> | KTR084 | Oil palm plantation | Johor, Malaysia | Male   | Adult     | -                    | -        | -        |
| 212. | <i>Tupaia glis</i> | KTR085 | Oil palm plantation | Johor, Malaysia | Female | Adult     | -                    | -        | -        |
| 213. | <i>Tupaia glis</i> | KTR088 | Oil palm plantation | Johor, Malaysia | Male   | Adult     | -                    | -        | -        |
| 214. | <i>Tupaia glis</i> | KTR089 | Oil palm plantation | Johor, Malaysia | Male   | Adult     | -                    | -        | -        |
| 215. | <i>Tupaia glis</i> | KTR090 | Oil palm plantation | Johor, Malaysia | Male   | Adult     | -                    | -        | -        |



|                                    |                    |        |                     |                 |      |       |                          |          |          |
|------------------------------------|--------------------|--------|---------------------|-----------------|------|-------|--------------------------|----------|----------|
| 216.                               | <i>Tupaia glis</i> | KTR091 | Oil palm plantation | Johor, Malaysia | Male | Adult | <i>Borrelia</i> sp. (RF) | UM-SNI14 | OP375128 |
| 217.                               | <i>Tupaia glis</i> | KTR100 | Oil palm plantation | Johor, Malaysia | Male | Adult | -                        | -        | -        |
| <b>Total number of individuals</b> |                    |        |                     |                 |      |       |                          | 47       | 217      |
